# Supplementary material
Source: MDPI journal article supplement (https://www.mdpi.com/2227-7390/12/7/951)
Supplement: s1 [file s1]

## Supplementary Materials

**Lemma S1.** Under C.1-C.4,  $\|\mathbf{g}_k(\boldsymbol{\beta})\| = O_p(n_k^{-1/2})$  and  $\|\dot{\mathbf{g}}_k(\boldsymbol{\beta}_0)\| = O_p(1)$ .

*Proof.* Without loss of generality, independent correlation structure and canonical link is considered. The true correlation matrix is approximated by  $\mathbf{A}^{-1/2} \mathbf{M}_1 \mathbf{A}^{-1/2}$ . Under canonical link, if we assume the scale parameter equals 1, then  $\partial \mu_{k,i}(\boldsymbol{\beta}) / \partial \boldsymbol{\beta} = \mathbf{A}_{k,i} \mathbf{X}_{k,i}$ . Let  $\tilde{\mathbf{X}}_{k,i} = \mathbf{X}_{k,i(r)}^O$  for all  $r$ , the submatrix of  $\mathbf{X}_{k,i(r)}$  with columns consist of observed covariates.

By C.4,

$$\begin{aligned} \frac{1}{n_k} \sum_{i=1}^{n_k} \mathbf{g}_{k,i(r)}(\boldsymbol{\beta}_0) &= \frac{1}{n_k} \sum_{i=1}^{n_k} \tilde{\mathbf{X}}_{k,i}^T \mathbf{A}_{k,i}^{1/2} \mathbf{M}_1 \mathbf{A}_{k,i}^{-1/2} (\mathbf{Y}_{k,i} - \mu_{k,i(r)}(\boldsymbol{\beta}_0)) \\ &= \frac{1}{n_k} \sum_{i=1}^{n_k} \tilde{\mathbf{X}}_{k,i}^T \mathbf{A}_{k,i}^{1/2} \mathbf{M}_1 \boldsymbol{\varepsilon}_{k,i} + \frac{1}{n_k} \sum_{i=1}^{n_k} \tilde{\mathbf{X}}_{k,i}^T \mathbf{A}_{k,i}^{1/2} \mathbf{M}_1 \mathbf{A}_{k,i}^{-1/2} (\mu_{k,i}(\boldsymbol{\beta}_0) - \mu_{k,i(r)}(\boldsymbol{\beta}_0)) \\ &= \frac{1}{n_k} \sum_{i=1}^{n_k} \tilde{\mathbf{X}}_{k,i}^T \mathbf{A}_{k,i}^{1/2} \mathbf{M}_1 \boldsymbol{\varepsilon}_{k,i} + o_p(n_k^{-1/2}). \end{aligned}$$

By Chebyshev's inequality and C.1-C.3,  $\|1/n_k \sum_{i=1}^{n_k} \tilde{\mathbf{X}}_{k,i}^T \mathbf{A}_{k,i}^{1/2} \mathbf{M}_1 \boldsymbol{\varepsilon}_{k,i}\| = O_p(n_k^{-1/2})$ . Also,  $K$  and number of imputations are both finite, implying  $n_k = O(n)$ . Therefore,  $\|\mathbf{g}_k(\boldsymbol{\beta})\| = O_p(n^{-1/2})$ .

Because each element of  $\dot{\mathbf{g}}_k(\boldsymbol{\beta}_0)$ ,

$$\frac{1}{n_k} \sum_{i=1}^{n_k} \dot{\mathbf{g}}_{k,i(r)}(\boldsymbol{\beta}_0) = \frac{1}{n_k} \sum_{i=1}^{n_k} \mathbf{X}_{k,i(r)}^T \mathbf{A}_{k,i}^{1/2} \mathbf{M}_1 \mathbf{A}_{k,i}^{-1/2} \tilde{\mathbf{X}}_{k,i}$$

is bounded in probability by Law of Large Number, C.1-C.2, and the finite number of imputations. It follows that  $\|\dot{\mathbf{g}}_k(\boldsymbol{\beta}_0)\| = O_p(1)$ .  $\square$

**Lemma S2.** Let  $Q_k(\boldsymbol{\beta}) = \mathbf{g}_k^T(\boldsymbol{\beta}) \mathbf{C}_k(\boldsymbol{\beta})^{-1} \mathbf{g}_k(\boldsymbol{\beta})$ . Under C.1-C.4, we have

$$\dot{Q}_k(\boldsymbol{\beta}_0) = 2\dot{\mathbf{g}}_k^T(\boldsymbol{\beta}_0) \mathbf{C}_k(\boldsymbol{\beta}_0)^{-1} \mathbf{g}_k(\boldsymbol{\beta}_0) + o_p(1)$$

and

$$\ddot{Q}_k(\boldsymbol{\beta}_0) = 2\ddot{\mathbf{g}}_k^T(\boldsymbol{\beta}_0) \mathbf{C}_k(\boldsymbol{\beta}_0)^{-1} \mathbf{g}_k(\boldsymbol{\beta}_0) + o_p(1).$$

*Proof.* By C.3 and Law of Large Number, we have  $\|\mathbf{C}_k(\boldsymbol{\beta}_0)\| = O_p(1)$ . Thus,

$$\begin{aligned} \dot{Q}_k(\boldsymbol{\beta}_0) &= 2\dot{\mathbf{g}}_k^T(\boldsymbol{\beta}_0) \mathbf{C}_k(\boldsymbol{\beta}_0)^{-1} \mathbf{g}_k(\boldsymbol{\beta}_0) + \mathbf{g}_k^T(\boldsymbol{\beta}_0) \dot{\mathbf{C}}_k(\boldsymbol{\beta}_0)^{-1} \mathbf{g}_k(\boldsymbol{\beta}_0) \\ &= 2\dot{\mathbf{g}}_k^T(\boldsymbol{\beta}_0) \mathbf{C}_k(\boldsymbol{\beta}_0)^{-1} \mathbf{g}_k(\boldsymbol{\beta}_0) + o_p(1), \end{aligned}$$

where  $\dot{\mathbf{C}}_k(\boldsymbol{\beta}_0)^{-1}$  is a three-dimensional array and is bounded in probability. Similarly, we can show that

$$\begin{aligned} \ddot{Q}_k(\boldsymbol{\beta}_0) &= 2\ddot{\mathbf{g}}_k^T(\boldsymbol{\beta}_0) \mathbf{C}_k(\boldsymbol{\beta}_0)^{-1} \mathbf{g}_k(\boldsymbol{\beta}_0) + 4\dot{\mathbf{g}}_k^T(\boldsymbol{\beta}_0) \frac{\partial \mathbf{C}_k(\boldsymbol{\beta}_0)^{-1}}{\partial \boldsymbol{\beta}} \mathbf{g}_k(\boldsymbol{\beta}_0) \\ &\quad + 2\ddot{\mathbf{g}}_k^T(\boldsymbol{\beta}_0) \mathbf{C}_k(\boldsymbol{\beta}_0)^{-1} \mathbf{g}_k(\boldsymbol{\beta}_0) + \mathbf{g}_k^T(\boldsymbol{\beta}_0) \ddot{\mathbf{C}}_k(\boldsymbol{\beta}_0)^{-1} \mathbf{g}_k(\boldsymbol{\beta}_0) \\ &= 2\ddot{\mathbf{g}}_k^T(\boldsymbol{\beta}_0) \mathbf{C}_k(\boldsymbol{\beta}_0)^{-1} \mathbf{g}_k(\boldsymbol{\beta}_0) + o_p(1). \end{aligned}$$

$\square$

## Proof of Theorem S1

*Proof.* It suffices to prove that for any  $\epsilon > 0$ , with probability at least  $1 - \epsilon$ , there exist a constant  $C_\epsilon$  such that a local minimizer exists within the ball

$$\{\boldsymbol{\beta}_0 + n^{-1/2}\mathbf{u} : \|\mathbf{u}\| < C_\epsilon\}.$$

Let  $Q_k = \mathbf{g}_k(\boldsymbol{\beta})^T \mathbf{C}_k(\boldsymbol{\beta})^{-1} \mathbf{g}_k(\boldsymbol{\beta})$ , where  $\mathbf{C}_k(\boldsymbol{\beta}) = 1/n_k \sum_{i=1}^{n_k} \mathbf{g}_{k,i}(\boldsymbol{\beta}) \mathbf{g}_{k,i}^T(\boldsymbol{\beta})$ . We notice that  $Q(\boldsymbol{\beta}) = \sum_{k=1}^K Q_k(\boldsymbol{\beta})$  since  $\mathbf{C}$  is a block-diagonal matrix.

By Taylor expansion,

$$\begin{aligned} S(\boldsymbol{\beta}_0 + n^{-1/2}\mathbf{u}) - S(\boldsymbol{\beta}_0) &= Q(\boldsymbol{\beta}_0 + n^{-1/2}\mathbf{u}) - Q(\boldsymbol{\beta}_0) + \sum_{j=1}^p \left[ p_{\lambda_n}(|\beta_{0j} + n^{-1/2}u_j|) - p_{\lambda_n}(|\beta_{0j}|) \right] \\ &= \sum_{k=1}^K \left[ Q_k(\boldsymbol{\beta}_0 + n^{-1/2}\mathbf{u}) - Q_k(\boldsymbol{\beta}_0) \right] + \sum_{j=1}^p \left[ p_{\lambda_n}(|\beta_{0j} + n^{-1/2}u_j|) - p_{\lambda_n}(|\beta_{0j}|) \right] \\ &\geq \sum_{k=1}^K \left[ Q_k(\boldsymbol{\beta}_0 + n^{-1/2}\mathbf{u}) - Q_k(\boldsymbol{\beta}_0) \right] + \sum_{j \in \mathcal{A}} \left[ p_{\lambda_n}(|\beta_{0j} + n^{-1/2}u_j|) - p_{\lambda_n}(|\beta_{0j}|) \right] \\ &= I_1 + I_2. \end{aligned}$$

We further expand  $I_1$  by Taylor expansion

$$\begin{aligned} I_1 &= \sum_{k=1}^K \left[ Q_k(\boldsymbol{\beta}_0 + n^{-1/2}\mathbf{u}) - Q_k(\boldsymbol{\beta}_0) \right] \\ &= \sum_{k=1}^K n^{-1/2} \mathbf{u}^T \dot{Q}_k(\boldsymbol{\beta}_0) + \sum_{k=1}^K \frac{1}{2} n^{-1} \mathbf{u}^T \ddot{Q}_k(\boldsymbol{\beta}_0) \mathbf{u} + \sum_{k=1}^K \frac{1}{6} n^{-3/2} \frac{\partial}{\partial \boldsymbol{\beta}} \left\{ \mathbf{u}^T \ddot{Q}_k(\boldsymbol{\beta}^*) \mathbf{u} \right\} \mathbf{u} \\ &= I_{11} + I_{12} + o_p(n^{-1}), \end{aligned}$$

where  $\boldsymbol{\beta}^*$  is an intermediate value between  $\hat{\boldsymbol{\beta}}$  and  $\boldsymbol{\beta}_0$ .

By Lemmas S1 and S2,

$$\|I_{11}\| \leq \sum_{k=1}^K n^{-1/2} \left\| 2\mathbf{u}^T \dot{\mathbf{g}}_k^T(\boldsymbol{\beta}_0) \mathbf{C}_k(\boldsymbol{\beta}_0)^{-1} \mathbf{g}_k(\boldsymbol{\beta}_0) + o_p(1) \right\| = O_p(n^{-1}) \|\mathbf{u}\|$$

and

$$\|I_{12}\| \leq \frac{1}{2} \sum_{k=1}^K n^{-1} \left\| 2\mathbf{u}^T \dot{\mathbf{g}}_k^T(\boldsymbol{\beta}_0) \mathbf{C}_k(\boldsymbol{\beta}_0)^{-1} \dot{\mathbf{g}}_k(\boldsymbol{\beta}_0) \mathbf{u} + o_p(1) \right\| = O_p(n^{-1}) \|\mathbf{u}\|^2.$$

By C.6,

$$\begin{aligned} I_2 &= \sum_{j \in \mathcal{A}} \left[ p_{\lambda_n}(|\beta_{0j} + n^{-1/2}u_j|) - p_{\lambda_n}(|\beta_{0j}|) \right] \\ &= \sum_{j \in \mathcal{A}} n^{-1/2} u_j p'_{\lambda_n}(|\beta_{0j}|) \text{sign}(|\beta_{0j}|) + \sum_{j \in \mathcal{A}} \frac{1}{2} n^{-1} u_j^2 p''_{\lambda_n}(|\beta_{0j}|) + o_p(n^{-1}) \\ &= I_{21} + I_{22}. \end{aligned}$$

Notice that

$$|I_{21}| \leq \sum_{j \in \mathcal{A}} |n^{-1/2} u_j p'_{\lambda_n}(|\beta_{0j}|) \text{sign}(\beta_{0j})| \leq \max_{j \in \mathcal{A}} \{p'_{\lambda_n}(\beta_{0j})\} \sum_{j \in \mathcal{A}} |n^{-1/2} u_j| \leq o_p(n^{-1}) \|\mathbf{u}\|$$

and

$$I_{22} \leq \max_{j \in \mathcal{A}} \{p''_{\lambda_n}(|\beta_{0j}|)\} \frac{1}{2} n^{-1} \|\mathbf{u}\|^2 = o_p(n^{-1}) \|\mathbf{u}\|^2.$$

By choosing sufficient large  $\|\mathbf{u}\|$ ,  $I_1 + I_2$  will be dominated by  $I_{12}$ , which is positive. Thus,  $S(\beta_0 + n^{-1/2} \mathbf{u}) - S(\beta_0) > 0$ . □

## Proof of Theorem S2

*Proof.* To prove sparsity, it suffices to prove that there exist  $M_0 > 0$  such that for any  $j \in \mathcal{N}$ ,

$$\begin{aligned} \frac{\partial S(\hat{\beta})}{\partial \beta_j} &> 0, \text{ when } 0 < \hat{\beta}_j < M_0 n^{-1/2} \\ \frac{\partial S(\hat{\beta})}{\partial \beta_j} &< 0, \text{ when } -M_0 n^{-1/2} < \hat{\beta}_j < 0. \end{aligned}$$

By Taylor expansion,

$$\begin{aligned} \frac{\partial S(\hat{\beta})}{\partial \beta_j} &= \frac{\partial Q(\hat{\beta})}{\partial \beta_j} + p'_{\lambda_n}(|\hat{\beta}_j|) \text{sign}(\hat{\beta}_j) \\ &= \frac{\partial Q(\beta_0)}{\partial \beta_j} + \sum_{l=1}^p \frac{\partial^2 Q(\beta_0)}{\partial \beta_j \partial \beta_l} (\hat{\beta}_l - \beta_{0l}) \\ &\quad + \sum_{l,k=1}^p \frac{\partial^3 Q(\beta^*)}{\partial \beta_j \partial \beta_l \partial \beta_k} (\hat{\beta}_l - \beta_{0l}) (\hat{\beta}_k - \beta_{0k}) + p'_{\lambda_n}(|\hat{\beta}_j|) \text{sign}(\hat{\beta}_j) \\ &= I_1 + I_2 + I_3 + I_4, \end{aligned}$$

where  $\beta^*$  is an intermediate value between  $\hat{\beta}$  and  $\beta_0$ .

By Lemma S2,  $\|I_1\| = O_p(n^{-1/2})$ . By the Cauchy-Schwarz inequality and Theorem 1, we have

$$\|I_2\|^2 \leq \|\ddot{Q}(\beta_0)\|^2 \|\hat{\beta} - \beta_0\|^2 = O_p(n^{-1})$$

and  $\|I_3\| = o_p(n^{-1/2})$ .

Because  $\lambda_n \rightarrow 0$  and  $\lambda_n \sqrt{n}/a_n \rightarrow \infty$ ,

$$I_4 = \lambda_n \{p'_{\lambda_n}(|\hat{\beta}_j|)/\lambda_n \text{sign}(\hat{\beta}_j)\}$$

dominates  $I_1$ ,  $I_2$ , and  $I_3$ . Therefore,  $\partial S(\hat{\beta})/\partial \beta_j$  has the same sign as  $\hat{\beta}_j$ . This finishes the proof of sparsity.

Next we prove the asymptotic normality. By the Taylor expansion,

$$\frac{\partial S(\hat{\beta})}{\partial \beta_{\mathcal{A}}} = \frac{\partial Q(\beta_0)}{\partial \beta_{\mathcal{A}}} + \frac{\partial^2 Q(\beta_0)}{\partial \beta_{\mathcal{A}} \partial \beta_{\mathcal{A}}^T} (\hat{\beta}_{\mathcal{A}} - \beta_{0\mathcal{A}}) + \mathcal{P}'_{\lambda_n}(|\beta_{0\mathcal{A}}|) \text{sign}(\beta_{0\mathcal{A}}) + \mathcal{P}''_{\lambda_n}(|\beta_{0\mathcal{A}}|) (\hat{\beta}_{\mathcal{A}} - \beta_{0\mathcal{A}}) + \mathbf{r}_n,$$

where  $\mathcal{P}'_{\lambda_n}(|\boldsymbol{\beta}|)$  is a vector consisting of  $p'_{\lambda_n}(|\boldsymbol{\beta}|)$  and  $\mathcal{P}''_{\lambda_n}(|\boldsymbol{\beta}|)$  is a diagonal matrix consisting of  $p''_{\lambda_n}(|\boldsymbol{\beta}|)$ . Because  $\hat{\boldsymbol{\beta}}$  is a local minimizer, indicating that  $\partial S(\hat{\boldsymbol{\beta}})/\partial \boldsymbol{\beta}_{\mathcal{A}} = 0$ , we obtain

$$\sqrt{n}(\hat{\boldsymbol{\beta}}_{\mathcal{A}} - \boldsymbol{\beta}_{0\mathcal{A}}) = -\sqrt{n} \left[ \frac{\partial^2 Q(\boldsymbol{\beta}_0)}{\partial \boldsymbol{\beta}_{\mathcal{A}} \partial \boldsymbol{\beta}_{\mathcal{A}}^T} + \mathcal{P}''_{\lambda_n}(|\boldsymbol{\beta}_{0\mathcal{A}}|) \right]^{-1} \left[ \frac{\partial Q(\boldsymbol{\beta}_0)}{\partial \boldsymbol{\beta}_{\mathcal{A}}} + \mathcal{P}'_{\lambda_n}(|\boldsymbol{\beta}_{0\mathcal{A}}|) \text{sign}(\boldsymbol{\beta}_{0\mathcal{A}}) + \mathbf{r}_n \right].$$

By the definition of SCAD penalty,  $\mathcal{P}''_{\lambda_n}(|\boldsymbol{\beta}_{0\mathcal{A}}|) \xrightarrow{p} \mathbf{0}$ ,  $\sqrt{n}\mathcal{P}'_{\lambda_n}(|\boldsymbol{\beta}_{0\mathcal{A}}|) \xrightarrow{p} \mathbf{0}$ , and  $\sqrt{n}\mathbf{r}_n \xrightarrow{p} \mathbf{0}$ . By Lemma S2,

$$\sqrt{n} \frac{\partial Q(\boldsymbol{\beta}_0)}{\partial \boldsymbol{\beta}_{\mathcal{A}}} = 2\sqrt{n} \frac{\partial \mathbf{g}(\boldsymbol{\beta}_0)}{\partial \boldsymbol{\beta}_{\mathcal{A}}} \mathbf{C}(\boldsymbol{\beta}_0)^{-1} \mathbf{g}(\boldsymbol{\beta}_0) + o_p(1).$$

By C.6 and Law of Large Numbers,  $\mathbf{C}(\boldsymbol{\beta}_0) \xrightarrow{p} \boldsymbol{\Sigma}$ ,  $\partial \mathbf{g}(\boldsymbol{\beta}_0)/\partial \boldsymbol{\beta}_{\mathcal{A}} \xrightarrow{p} \mathbf{H}$ , and  $\sqrt{n}\mathbf{g}(\boldsymbol{\beta}_0) \xrightarrow{d} N(\mathbf{0}, \boldsymbol{\Sigma}\boldsymbol{\Omega})$ . By C.6, Slutsky's Theorem, and continuous mapping, we have

$$\sqrt{n} \left[ \frac{\partial Q(\boldsymbol{\beta}_0)}{\partial \boldsymbol{\beta}_{\mathcal{A}}} + \mathcal{P}'_{\lambda_n}(|\boldsymbol{\beta}_{0\mathcal{A}}|) \text{sign}(\boldsymbol{\beta}_{0\mathcal{A}}) + \mathbf{r}_n \right] \xrightarrow{d} N(\mathbf{0}, 4\mathbf{H}\boldsymbol{\Sigma}^{-1}\boldsymbol{\Omega}\mathbf{H}^T).$$

Similarly, we can show that

$$\frac{\partial^2 Q(\boldsymbol{\beta}_0)}{\partial \boldsymbol{\beta}_{\mathcal{A}} \partial \boldsymbol{\beta}_{\mathcal{A}}^T} + \mathcal{P}''_{\lambda_n}(|\boldsymbol{\beta}_{0\mathcal{A}}|) \xrightarrow{p} 2\mathbf{H}\boldsymbol{\Sigma}^{-1}\mathbf{H}^T.$$

Again, by Slutsky's Theorem,  $\sqrt{n}(\hat{\boldsymbol{\beta}}_{\mathcal{A}} - \boldsymbol{\beta}_{0\mathcal{A}}) \xrightarrow{d} N(\mathbf{0}, \mathbf{V})$ , where  $\mathbf{V} = (\mathbf{H}\boldsymbol{\Sigma}^{-1}\boldsymbol{\Omega}^{-1}\mathbf{H}^T)^{-1}$ . □

### Proof of Theorem S3

*Proof.* We use the similar notation as Theorem S2 with  $\tilde{\mathbf{V}} = (\tilde{\mathbf{H}}\tilde{\mathbf{C}}^{-1}\tilde{\boldsymbol{\Omega}}^{-1}\tilde{\mathbf{H}}^T)^{-1}$ . It suffices to prove that  $\mathbf{H}\mathbf{C}^{-1}\mathbf{H}^T \geq \tilde{\mathbf{H}}\tilde{\mathbf{C}}^{-1}\tilde{\mathbf{H}}^T$ . Because  $\tilde{\mathbf{V}}$  and  $\mathbf{V}$  are block-diagonal matrices, we have

$$\mathbf{H}\mathbf{C}^{-1}\mathbf{H}^T = \sum_{k=1}^K \mathbf{H}_k \mathbf{C}_k^{-1} \mathbf{H}_k^T$$

and

$$\tilde{\mathbf{H}}\tilde{\mathbf{C}}^{-1}\tilde{\mathbf{H}}^T = \sum_{k=1}^K \tilde{\mathbf{H}}_k \tilde{\mathbf{C}}_k^{-1} \tilde{\mathbf{H}}_k^T.$$

Obviously,  $\mathbf{H}\mathbf{C}^{-1}\mathbf{H}^T \geq \tilde{\mathbf{H}}\tilde{\mathbf{C}}^{-1}\tilde{\mathbf{H}}^T$  will hold if, for any  $k$ ,  $\mathbf{H}_k \mathbf{C}_k^{-1} \mathbf{H}_k^T \geq \tilde{\mathbf{H}}_k \tilde{\mathbf{C}}_k^{-1} \tilde{\mathbf{H}}_k^T$ .

Let  $\mathbf{G}_k(\boldsymbol{\beta}) = (\mathbf{g}_{k,1}(\boldsymbol{\beta}), \dots, \mathbf{g}_{k,n_k}(\boldsymbol{\beta}))$ . Then, we reordering the row of  $\mathbf{G}_k(\boldsymbol{\beta})$  by letting  $\mathbf{B}_k$  be a matrix such that  $\mathbf{B}_k \mathbf{G}_k(\boldsymbol{\beta}) = (\mathbf{G}_{k1}^T(\boldsymbol{\beta}), \mathbf{G}_{k2}^T(\boldsymbol{\beta}))^T$ , where  $\mathbf{G}_{k1}(\boldsymbol{\beta})$  are the estimating equations constructed based on complete cases and  $\mathbf{G}_{k2}(\boldsymbol{\beta})$  are the remaining estimating equations. We make the following transformation

$$\mathbf{G}_{k20}(\boldsymbol{\beta}) = \mathbf{G}_{k2}(\boldsymbol{\beta}) - \left[ \frac{1}{n_k} \mathbf{G}_{k1}(\boldsymbol{\beta}) \mathbf{G}_{k2}^T(\boldsymbol{\beta}) \right] \left[ \frac{1}{n_k} \mathbf{G}_{k1}(\boldsymbol{\beta}) \mathbf{G}_{k1}^T(\boldsymbol{\beta}) \right]^{-1} \mathbf{G}_{k1}(\boldsymbol{\beta}).$$

It follows that  $\mathbf{G}_{k1}(\boldsymbol{\beta})\mathbf{G}_{k20}^T(\boldsymbol{\beta}) = \mathbf{0}$ . Let  $\mathbf{U}_k$  be a matrix such that  $\mathbf{U}_k\mathbf{G}_k(\boldsymbol{\beta}) = (\mathbf{G}_{k1}^T(\boldsymbol{\beta}), \mathbf{G}_{k20}^T(\boldsymbol{\beta}))^T$ . Define  $\mathbf{H}_k\mathbf{U}_k^T = (\widetilde{\mathbf{H}}_k, \widetilde{\mathbf{H}}_{k2})$ . Thus

$$\begin{aligned}\mathbf{H}_k\mathbf{C}_{0k}^{-1}\mathbf{H}_k^T &= \mathbf{H}_k\mathbf{U}_k^T \left[ \mathbf{U}_k\mathbf{C}_k\mathbf{U}_k^T \right]^{-1} \mathbf{U}_k\mathbf{H}_k^T \\ &= \widetilde{\mathbf{H}}_k\widetilde{\mathbf{C}}_k^{-1}\widetilde{\mathbf{H}}_k^T + \widetilde{\mathbf{H}}_{k2}\widetilde{\mathbf{C}}_{k2}^{-1}\widetilde{\mathbf{H}}_{k2}^T,\end{aligned}$$

where  $\widetilde{\mathbf{C}}_{k2} = 1/n_k\mathbf{G}_{k20}(\boldsymbol{\beta})\mathbf{G}_{k20}^T(\boldsymbol{\beta})$ . The last equality is because

$$\mathbf{U}_k\mathbf{C}_k\mathbf{U}_k^T = \mathbf{U}_k \left[ \frac{1}{n_k}\mathbf{G}_k(\boldsymbol{\beta})\mathbf{G}_k^T(\boldsymbol{\beta}) \right] \mathbf{U}_k^T.$$

Note that  $\widetilde{\mathbf{H}}_{k2}\widetilde{\mathbf{C}}_{k2}^{-1}\widetilde{\mathbf{H}}_{k2}^T$  is a positive semidefinite matrix. Thus,  $\mathbf{H}_k\mathbf{C}_k^{-1}\mathbf{H}_k^T \geq \widetilde{\mathbf{H}}_k\widetilde{\mathbf{C}}_k^{-1}\widetilde{\mathbf{H}}_k^T$ .  $\square$

**Lemma S3.** Under D.1,  $\|\ddot{Q}_k(\boldsymbol{\beta}_0) - E\{\ddot{Q}_k(\boldsymbol{\beta}_0)\}\| = O_p(p_n^3n^{-1})$ .

*Proof.* By D.1 and Chebyshev's inequality, for any  $\varepsilon > 0$ ,

$$\begin{aligned}P\left(\|\ddot{Q}_k(\boldsymbol{\beta}_0) - E\{\ddot{Q}_k(\boldsymbol{\beta}_0)\}\| \geq \frac{\varepsilon}{p_n}\right) &\leq \frac{p_n^2}{\varepsilon^2}E\left(\|\ddot{Q}_k(\boldsymbol{\beta}_0) - E\{\ddot{Q}_k(\boldsymbol{\beta}_0)\}\|^2\right) \\ &= \frac{p_n^2}{\varepsilon^2}E\left(\sum_{i=1}^{p_n}\sum_{j=1}^{p_n}\left[\frac{\partial^2 Q_k(\boldsymbol{\beta}_0)}{\partial\beta_i\partial\beta_j} - E\left\{\frac{\partial^2 Q_k(\boldsymbol{\beta}_0)}{\partial\beta_i\partial\beta_j}\right\}\right]^2\right) \\ &= O_p(p_n^4n^{-1}).\end{aligned}$$

$\square$

## Proof of Theorem S4

*Proof.* The proof is similar as Theorem S1. It suffices to prove that for any  $\epsilon > 0$ , with probability at least  $1 - \epsilon$ , there exist a constant  $C_\epsilon$  such that a local minimizer exists within the ball

$$\{\boldsymbol{\beta}_0 + p_n^{1/2}n^{-1/2}\mathbf{u} : \|\mathbf{u}\| < C_\epsilon\}.$$

We first notice that by D.2,

$$\begin{aligned}p_n^{\frac{3}{2}}n^{-\frac{3}{2}}\left\|\frac{\partial}{\partial\boldsymbol{\beta}}\{\mathbf{u}^T\ddot{Q}_k(\boldsymbol{\beta}^*)\mathbf{u}\}\mathbf{u}\right\| &= p_n^{\frac{3}{2}}n^{-\frac{3}{2}}\left\|\sum_{i,j,k=1}^{p_n}\frac{\partial^3 Q(\boldsymbol{\beta})}{\partial\beta_i\partial\beta_j\partial\beta_k}u_iu_ju_k\right\| \\ &\leq p_n^{\frac{3}{2}}n^{-\frac{3}{2}}\left\|\sum_{i,j,k=1}^{p_n}M^2\right\|^{1/2}\|\mathbf{u}\|^3 \\ &= o_p(p_nn^{-1})\|\mathbf{u}\|^3.\end{aligned}$$

Thus, by Taylor expansion,

$$\begin{aligned}S(\boldsymbol{\beta}_0 + p_n^{1/2}n^{-1/2}\mathbf{u}) - S(\boldsymbol{\beta}_0) &\geq \sum_{k=1}^K p_n^{1/2}n^{-1/2}\mathbf{u}^T\dot{Q}_k(\boldsymbol{\beta}_0) + \sum_{k=1}^K \frac{1}{2}p_nn^{-1}\mathbf{u}^T\ddot{Q}_k(\boldsymbol{\beta}_0)\mathbf{u} \\ &\quad + \sum_{j \in \mathcal{A}} p_n^{1/2}n^{-1/2}u_j p'_{\lambda_n}(|\beta_{0j}|)\text{sign}(|\beta_{0j}|) + \sum_{j \in \mathcal{A}} \frac{1}{2}p_nn^{-1}u_j^2 p''_{\lambda_n}(|\beta_{0j}|) + o_p(p_nn^{-1}) \\ &= I_{11} + I_{12} + I_{21} + I_{22}.\end{aligned}$$

By D.1,  $\|I_{11}\| = O_p(p_n n^{-1})\|\mathbf{u}\|$ .  
 From Lemma S3,

$$\begin{aligned} I_{12} &= \sum_{k=1}^K \frac{1}{2} p_n n^{-1} \mathbf{u}^T \left[ \ddot{Q}_k(\boldsymbol{\beta}_0) - E\{\ddot{Q}_k(\boldsymbol{\beta}_0)\} \right] \mathbf{u} + \sum_{k=1}^K \frac{1}{2} p_n n^{-1} \mathbf{u}^T \left[ E\{\ddot{Q}_k(\boldsymbol{\beta}_0)\} \right] \mathbf{u} \\ &= \sum_{k=1}^K \frac{1}{2} p_n n^{-1} \mathbf{u}^T \left[ E\{\ddot{Q}_k(\boldsymbol{\beta}_0)\} \right] \mathbf{u} + \frac{1}{2} o_p(p_n n^{-1}) \|\mathbf{u}\|^2. \end{aligned}$$

$$|I_{21}| \leq \sum_{j \in \mathcal{A}} |p_n^{1/2} n^{-1/2} u_j p'_{\lambda_n}(|\beta_{0j}|) \text{sign}(\beta_{0j})| \leq \max_{j \in \mathcal{A}} \{p'_{\lambda_n}(\beta_{0j})\} \sum_{j \in \mathcal{A}} |p_n^{1/2} n^{-1/2} u_j| \leq o_p(p_n n^{-1}) \|\mathbf{u}\|$$

and

$$I_{22} \leq \max_{j \in \mathcal{A}} \{p''_{\lambda_n}(|\beta_{0j}|)\} \frac{1}{2} p_n n^{-1} \|\mathbf{u}\|^2 = o_p(p_n n^{-1}) \|\mathbf{u}\|^2.$$

By choosing sufficient large  $\|\mathbf{u}\|$ ,  $I_{11} + I_{12} + I_{21} + I_{22}$  will be dominated by  $I_{12}$ , which is positive. Thus,  $S(\boldsymbol{\beta}_0 + p_n^{1/2} n^{-1/2} \mathbf{u}) - S(\boldsymbol{\beta}_0) > 0$ .

□
